# Supplementary material
Source: PubMed Central journal article supplement (PMC3001412)

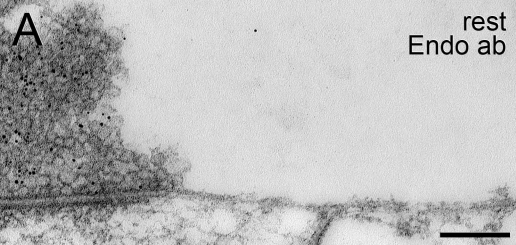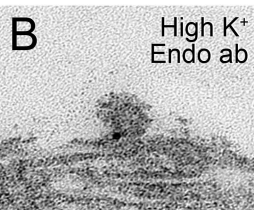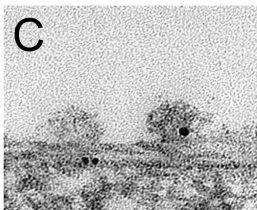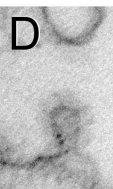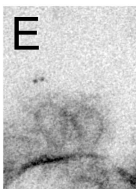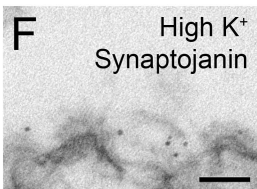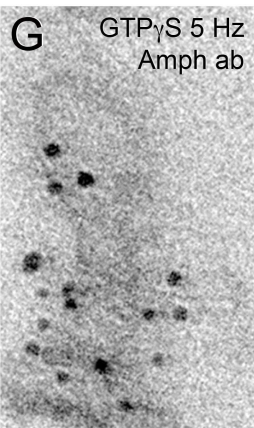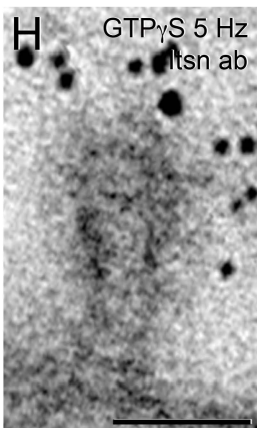

Supplement: supp_124_1_133__1.pdf [file supp_124_1_133__1.pdf]

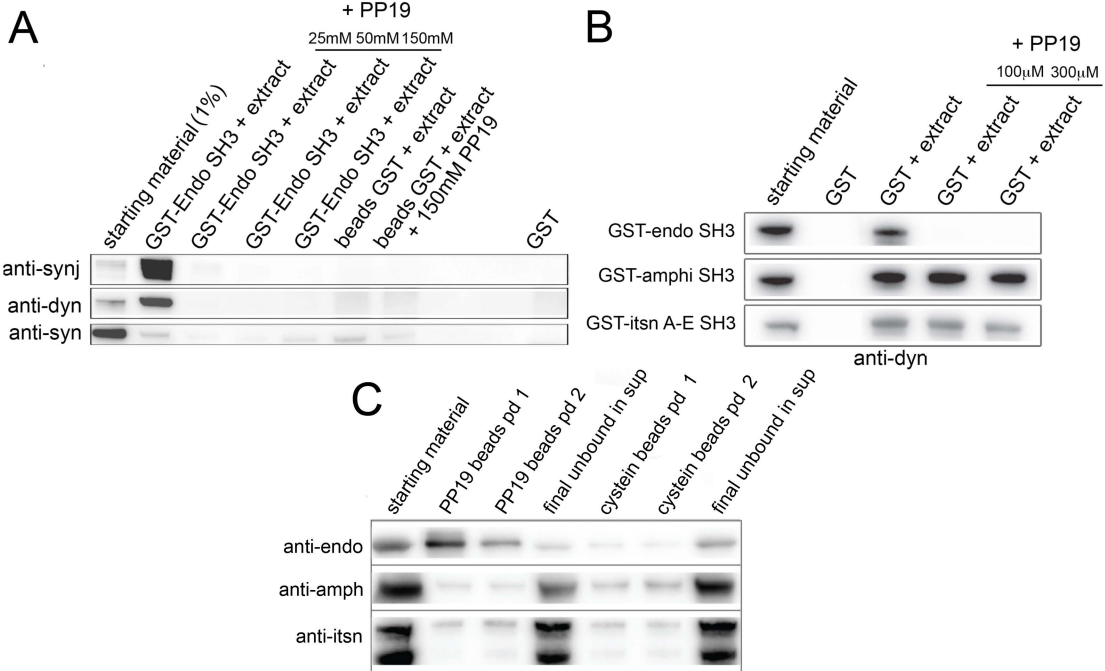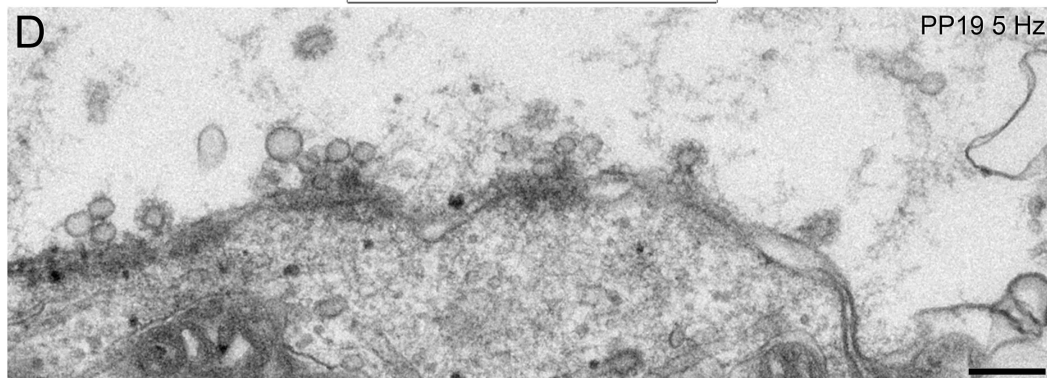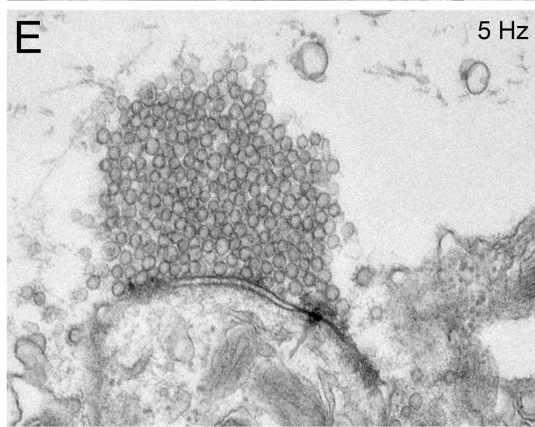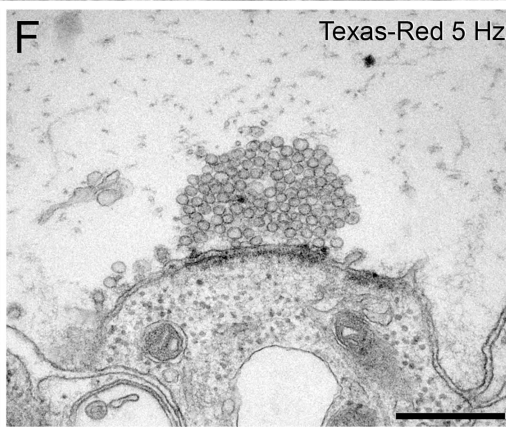

Supplement: supp_124_1_133__2.pdf [file supp_124_1_133__2.pdf]

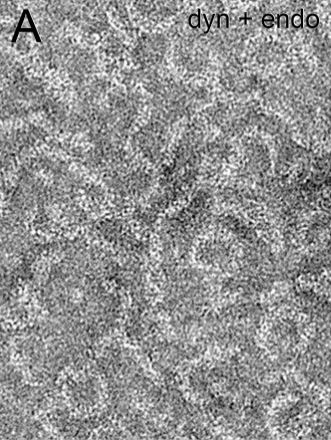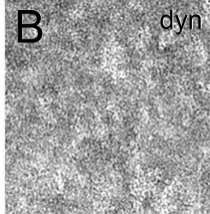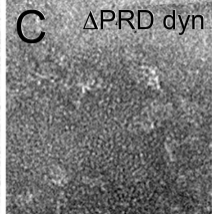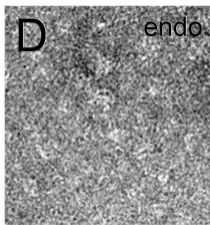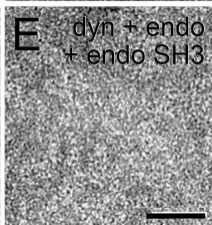

Supplement: supp_124_1_133__3.pdf [file supp_124_1_133__3.pdf]

**A**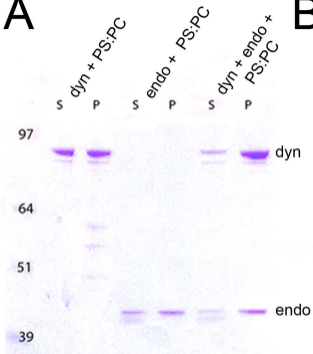**B**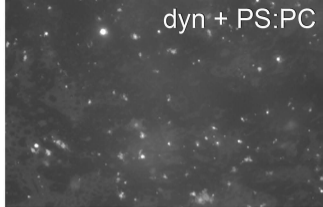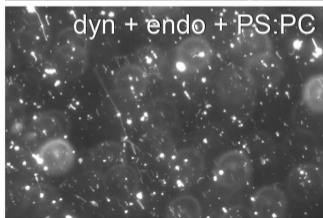

Supplement: supp_124_1_133__4.pdf [file supp_124_1_133__4.pdf]

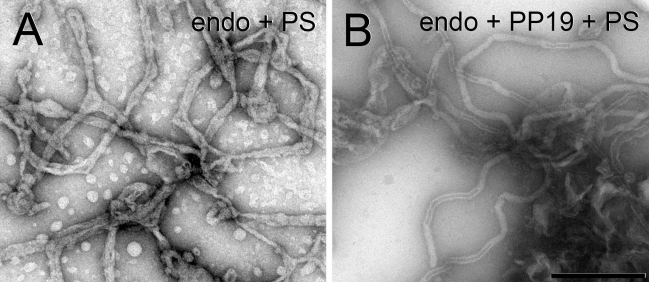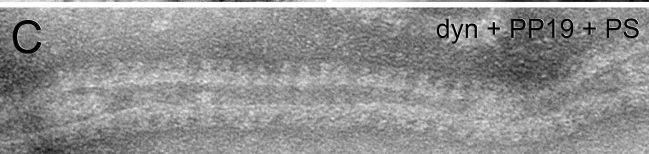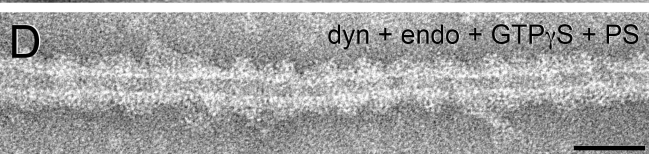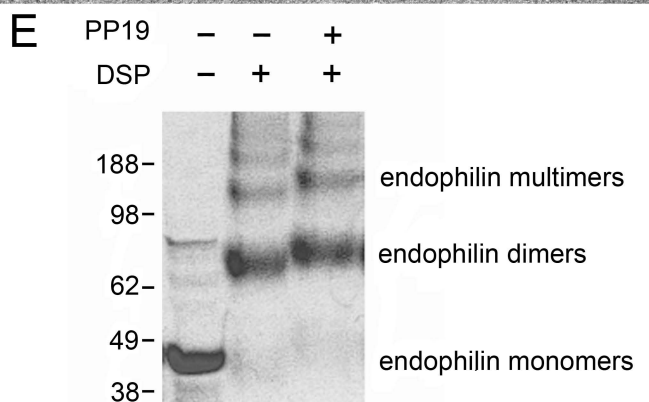

Supplement: supp_124_1_133__5.pdf [file supp_124_1_133__5.pdf]
